# Supplementary material
Source: publisher site journal article supplement (https://www.dovepress.com/article/443217)
Supplement: Supplementary file 1 [file get_supplementary_file.php]

Supplementary Table 1

**COREQ checklist of 32 items**

Tong A, Sainsbury P, Craig J. Consolidated criteria for reporting qualitative research (COREQ): a 32-item checklist for interviews and focus groups. *International Journal for Quality in Health Care*. 2007. Volume 19, Number 6: pp. 349 – 357

**Title: A qualitative exploration of patient’s preference for breast cancer treatment in New Zealand: Insights from focus group discussions and individual interviews.**

| No. Item                                       | Guide questions/description                                                                                                                              | Reported on Page #     |
|------------------------------------------------|----------------------------------------------------------------------------------------------------------------------------------------------------------|------------------------|
| <b>Domain 1: Research team and reflexivity</b> |                                                                                                                                                          |                        |
| <i>Personal Characteristics</i>                |                                                                                                                                                          |                        |
| 1. Interviewer/facilitator                     | Which author/s conducted the interview or focus group?                                                                                                   | Page 5-6, Line 139-143 |
| 2. Credentials                                 | What were the researcher’s credentials? E.g. PhD, MD                                                                                                     | Page 5, Line 140       |
| 3. Occupation                                  | What was their occupation at the time of the study?                                                                                                      | Page 5, Line 140       |
| 4. Gender                                      | Was the researcher male or female?                                                                                                                       | Page 5, Line 140       |
| 5. Experience and training                     | What experience or training did the researcher have?                                                                                                     | Page 6, Line 143-145   |
| <i>Relationship with participants</i>          |                                                                                                                                                          |                        |
| 6. Relationship established                    | Was a relationship established prior to study commencement?                                                                                              | Page 5, Line 128-136   |
| 7. Participant knowledge of the interviewer    | What did the participants know about the researcher? e.g. personal goals, reasons for doing the research                                                 | Page 5, Line 128-136   |
| 8. Interviewer characteristics                 | What characteristics were reported about the interviewer/facilitator? e.g. Bias, assumptions, reasons and interests in the research topic                | N/A                    |
| <b>Domain 2: study design</b>                  |                                                                                                                                                          |                        |
| <i>Theoretical framework</i>                   |                                                                                                                                                          |                        |
| 9. Methodological orientation and Theory       | What methodological orientation was stated to underpin the study? e.g. grounded theory, discourse analysis, ethnography, phenomenology, content analysis | Page 6-7, Line 167-184 |
| <i>Participant selection</i>                   |                                                                                                                                                          |                        |
| 10. Sampling                                   | How were participants selected? e.g. purposive, convenience, consecutive, snowball                                                                       | Page 5, Line 124       |
| 11. Method of approach                         | How were participants approached? e.g. face-to-face, telephone, mail, email                                                                              | Page 5, Line 128-129   |
| 12. Sample size                                | How many participants were in the study?                                                                                                                 | Page 7, Line 194-197   |
| 13. Non-participation                          | How many people refused to participate or dropped out? Reasons?                                                                                          | Page 7, Line 194-196   |
| <i>Setting</i>                                 |                                                                                                                                                          |                        |
| 14. Setting of data collection                 | Where was the data collected? e.g. home, clinic, workplace                                                                                               | Page 6, Line 145-147   |
| 15. Presence of non-participants               | Was anyone else present besides the participants and researchers?                                                                                        | Page 5-6, Line 141-143 |

|                                        |                                                                                                                                 |                                                 |
|----------------------------------------|---------------------------------------------------------------------------------------------------------------------------------|-------------------------------------------------|
| 16. Description of sample              | What are the important characteristics of the sample? e.g. demographic data, date                                               | Page 7, Line 194-201 and Table 1 (page 25)      |
| <i>Data collection</i>                 |                                                                                                                                 |                                                 |
| 17. Interview guide                    | Were questions, prompts, guides provided by the authors? Was it pilot tested?                                                   | Page 6, Line 148-154 and Supplementary Table 2. |
| 18. Repeat interviews                  | Were repeat inter views carried out? If yes, how many?                                                                          | N/A                                             |
| 19. Audio/visual recording             | Did the research use audio or visual recording to collect the data?                                                             | Page 6, Line 156                                |
| 20. Field notes                        | Were field notes made during and/or after the interview or focus group?                                                         | Page 5-6, Line 141-142                          |
| 21. Duration                           | What was the duration of the interviews or focus group?                                                                         | Page 6, Line 154-156                            |
| 22. Data saturation                    | Was data saturation discussed?                                                                                                  | Page 6, Line 163-165                            |
| 23. Transcripts returned               | Were transcripts returned to participants for comment and/or correction?                                                        | Page 6, Line 157-162                            |
| <b>Domain 3: analysis and findings</b> |                                                                                                                                 |                                                 |
| <i>Data analysis</i>                   |                                                                                                                                 |                                                 |
| 24. Number of data coders              | How many data coders coded the data?                                                                                            | Page 7, Line 175-184                            |
| 25. Description of the coding tree     | Did authors provide a description of the coding tree?                                                                           | N/A                                             |
| 26. Derivation of themes               | Were themes identified in advance or derived from the data?                                                                     | Page 7, Line 175-179                            |
| 27. Software                           | What software, if applicable, was used to manage the data?                                                                      | Page 6, Line 167                                |
| 28. Participant checking               | Did participants provide feedback on the findings?                                                                              | Page 6, Line 157-162                            |
| <i>Reporting</i>                       |                                                                                                                                 |                                                 |
| 29. Quotations presented               | Were participant quotations presented to illustrate the themes/findings? Was each quotation identified? e.g. participant number | Page 8-16, Line 205-410                         |
| 30. Data and findings consistent       | Was there consistency between the data presented and the findings?                                                              | N/A                                             |
| 31. Clarity of major themes            | Were major themes clearly presented in the findings?                                                                            | Page 8-16, Line 219-414                         |
| 32. Clarity of minor themes            | Is there a description of diverse cases or discussion of minor themes?                                                          | Page 8-16, Line 219-414                         |

*Supplementary Table 2*

**Planned questions and prompts used in focus group discussions and individual interviews.**

| <b>Planned order</b> | <b>Question</b>                                                                                                                                                                          |
|----------------------|------------------------------------------------------------------------------------------------------------------------------------------------------------------------------------------|
| 1                    | What are the 5 features about breast cancer treatment that are important to you? Take a moment and write these down for discussion.                                                      |
| 2                    | Can you please think back to a cancer treatment that you felt was especially good. What made it so good?                                                                                 |
| 3                    | Think back to a cancer treatment that was not good for you. What made it undesirable?                                                                                                    |
| 4                    | How do you find the method of taking your current cancer treatment? Is there anything you would like to change about the way you take it?                                                |
| 5                    | Thinking about your life at the moment, how often do you see a doctor or nurse about your treatment? (Prompt: waiting time for an appointment)                                           |
| 6                    | Going back to question 1, why do these attributes matter to you?                                                                                                                         |
| 7                    | When deciding on starting or switching a cancer treatment, which treatment feature would you consider to be the most important or least important? Why?                                  |
| 8                    | Have any of you ever had adverse effects from any of your breast cancer treatments? If yes, what happened?                                                                               |
| 9                    | What adverse effects worry you the most? Why is that so?                                                                                                                                 |
| 10                   | Do you do anything to try and prevent adverse effects? If yes, what did you do?                                                                                                          |
| 11                   | Do these treatments affect your daily life – in what ways? (Prompt: eating, washing yourself, family life, social activities, financial hardship)                                        |
| 12                   | What aspects of breast cancer treatment are most challenging to deal with – why and how do you cope with it?                                                                             |
| 13                   | Do you think your oncologist should discuss the potential cost incurred or eligibility for funded treatment with you?                                                                    |
| 14                   | If there were a treatment with better outcomes and/or lesser adverse effects, but it will not be funded by the government, would you be willing to pay for it out of pocket? Why yes/no? |
